# Supplementary material for: The pitfalls of short-range endemism: high vulnerability to ecological and landscape traps
Source: PeerJ. 2018 May 4;6:e4715. doi: 10.7717/peerj.4715 (PMC5937473; doi:10.7717/peerj.4715)
Supplement: Supplemental Information 1 — Species were categorised by size with values for abundance and number of recognisable taxonomic units within each category. [file peerj-06-4715-s001.xlsx]

## Sheet: Sheet1
	Bare		Weed		Allocasuarina		Banksia
Size (mm)	Abundance	Number of RTUs	Abundance	Number of RTUs	Abundance	Number of RTUs	Abundance	Number of RTUs
0.5	0	0	3	1	15	1	18	1
1	69	2	108	1	6099	3	144	2
2	351	6	9	2	84	8	66	6
3	0	0	3	1	45	1	36	2
4	3	1	3	1	12	2	18	2
5	9	1	3	1	3	1	6	2
6	0	0	0	0	21	1	0	1
7	0	0	0	0	3	1	0	0
8	0	0	0	0	36	1	0	1
9	0	0	0	0	3	1	0	0
10	51	1	57	2	255	2	66	2
11	0	0	0	0	0	0	33	0
12	0	0	0	0	6	1	3	1
20	0	0	3	0	0	0	0	0
30	0	0	0	1	0	0	0	1
40	0	0	24	1	9	1	3	1
Total	483	11	213	10	6591	23	393	21
